# Supplementary material
Source: MDPI journal article supplement (https://www.mdpi.com/2079-6412/13/4/797)
Supplement: s1 [file s1]

# A Study of the Laser-Assisted Alloying Effect on Plasmonic Properties of Au-Pd Nanostructured Film Using Surface-Enhanced Raman Spectroscopy

Chawki Awada <sup>1,\*</sup> and Francesco Ruffino <sup>2,\*</sup>

<sup>1</sup> Department of Physics, College of Science, King Faisal University, P.O. Box 400, Al-Ahsa 31982, Saudi Arabia

<sup>2</sup> Dipartimento di Fisica e Astronomia “Ettore Majorana”, Università di Catania and CNR-IMM, Catania (University) Unit, 95123 Catania, Italy

\* Correspondence: cawada@kfu.edu.sa (C.A.); francesco.ruffino@ct.infn.it (F.R.)

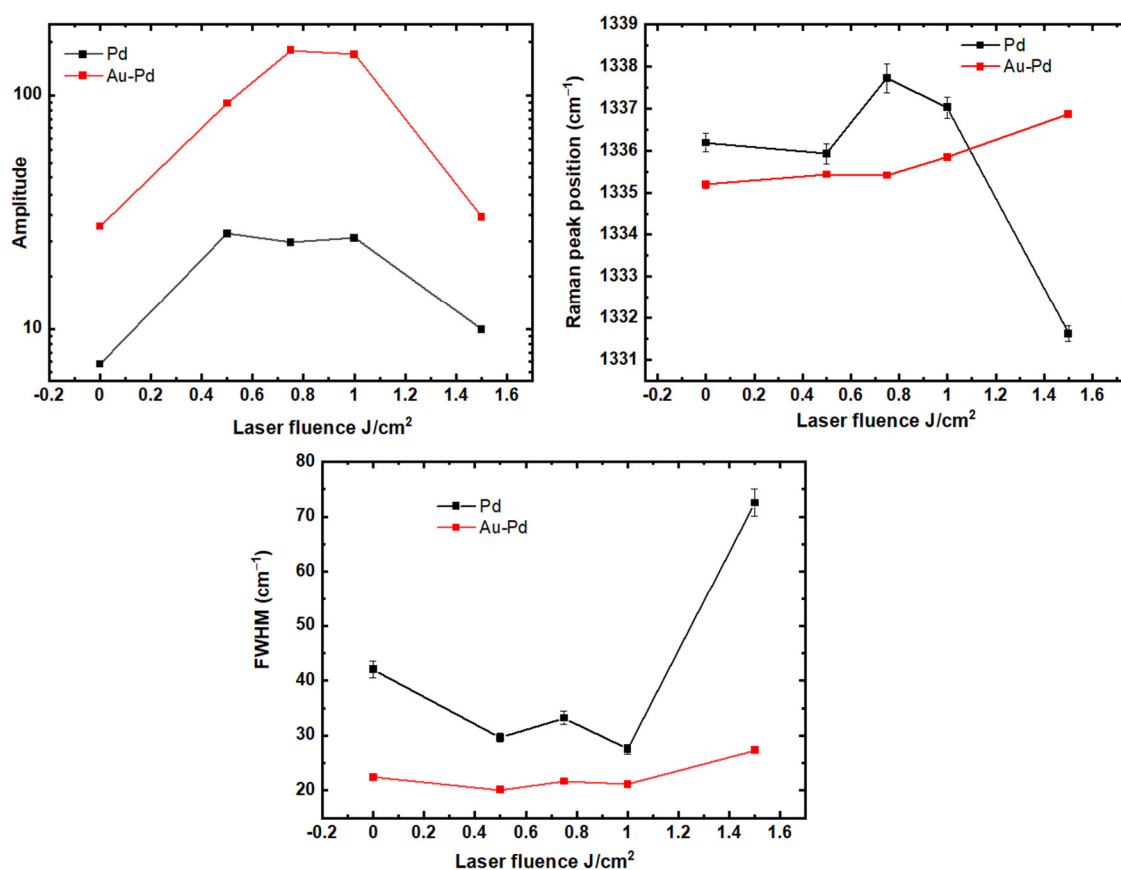

**Figure S1.** (a) Variation of amplitude as function of laser fluence for Pd and Au-Pd, (b) Raman peak position, and (c) FWHM.
